# Supplementary material for: Porous single crystal niobium nitride and tantalum nitride nanocubes boost catalytic performance
Source: Royal Society of Chemistry journal article supplement (doi:10.1039/d2nj04258d), 2022-11-29
Supplement: d2nj04258d1.pdf [file d2nj04258d1.pdf]

## Supporting Information

### **Porous single crystal niobium nitride and tantalum nitride nanocubes boost catalytic performance**

Wanxiang Zhao,<sup>a,b</sup> Kui Xie<sup>\*b,c</sup>

<sup>a</sup> College of Chemical Engineering, Fuzhou University, Fuzhou 350108, China.

<sup>b</sup> Key Laboratory of Design and Assembly of Functional Nanostructures, and Fujian Key Laboratory of Nanomaterials, Fujian Institute of Research on the Structure of Matter, Chinese Academy of Sciences, Fuzhou, Fujian 350002, China. E-mail: [kxie@fjirsm.ac.cn](mailto:kxie@fjirsm.ac.cn).

<sup>c</sup> Advanced Energy Science and Technology Guangdong Laboratory, 29 Sanxin North Road, Huizhou, Guangdong 116023. China.

### Lewis acid sites:

The density of Lewis acid sites at surface is calculated according to the equation:

$$d = D_{SAPO-34} \times A \times N_A / (A_{SAPO-34} \times S_{BET}) \quad (1)$$

Where  $d$  is the density of Lewis acid site of test samples,  $D_{SAPO-34}$  is the density of acid site of standard sample SAPO-34 which is  $2.55 \times 10^{-4}$  mol/g.<sup>1,2</sup>  $A$  is the integral area of the mass spectrometry signal of  $-NH_2$  of PSC-N Ta<sub>3</sub>N<sub>5</sub> or PSC-N Nb<sub>4</sub>N<sub>5</sub> monoliths harvested by NH<sub>3</sub>-TPD.  $A_{SAPO-34}$  is the integral area of mass spectrometry signal of NH<sub>3</sub> of SAPO-34.  $N_A$  is the Avogadro's number.  $S_{BET}$  is the specific surface area of PSC-N Ta<sub>3</sub>N<sub>5</sub> or PSC-N Nb<sub>4</sub>N<sub>5</sub>.

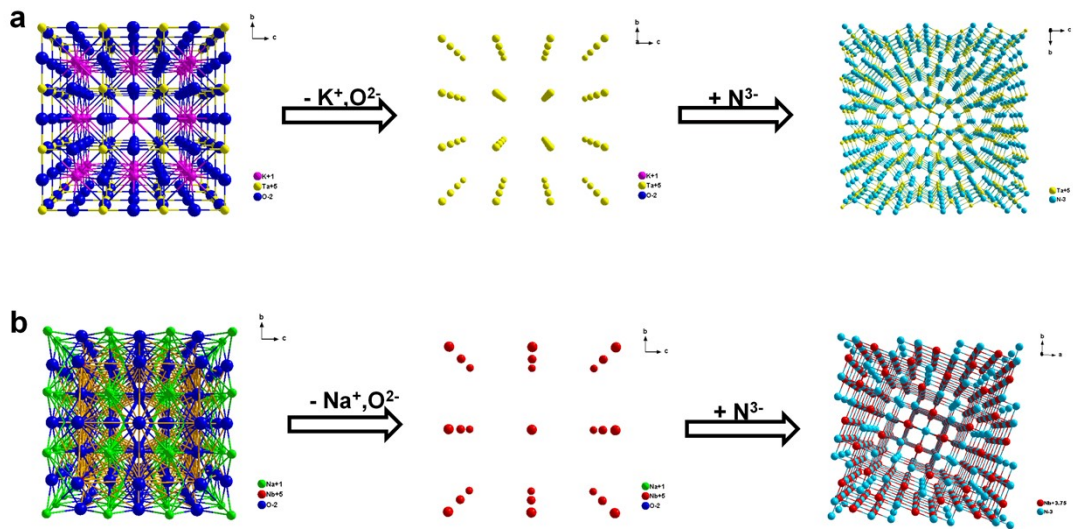

Fig. S1. Structure of KTaO<sub>3</sub> and NaNbO<sub>3</sub> Non-porous single crystal, and schematic procedure for the major experimental step of synthesis of PSC Nb<sub>4</sub>N<sub>5</sub> and PSC Ta<sub>3</sub>N<sub>5</sub>.

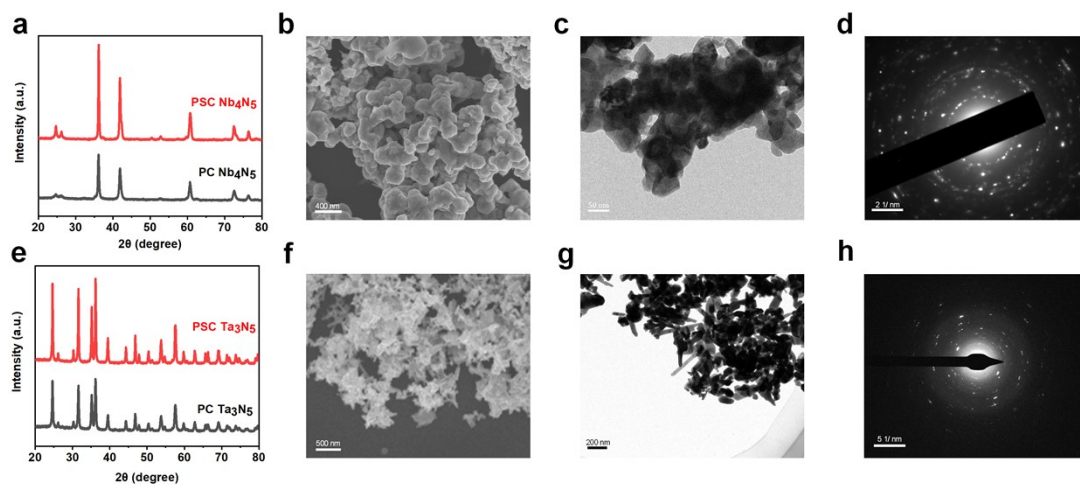

Fig. S2. (a-d) XRD pattern, SEM image, TEM image and SAED pattern of PC Nb<sub>4</sub>N<sub>5</sub>, respectively. (e-h) XRD pattern, SEM image, TEM image and SAED pattern of PC Ta<sub>3</sub>N<sub>5</sub>, respectively.

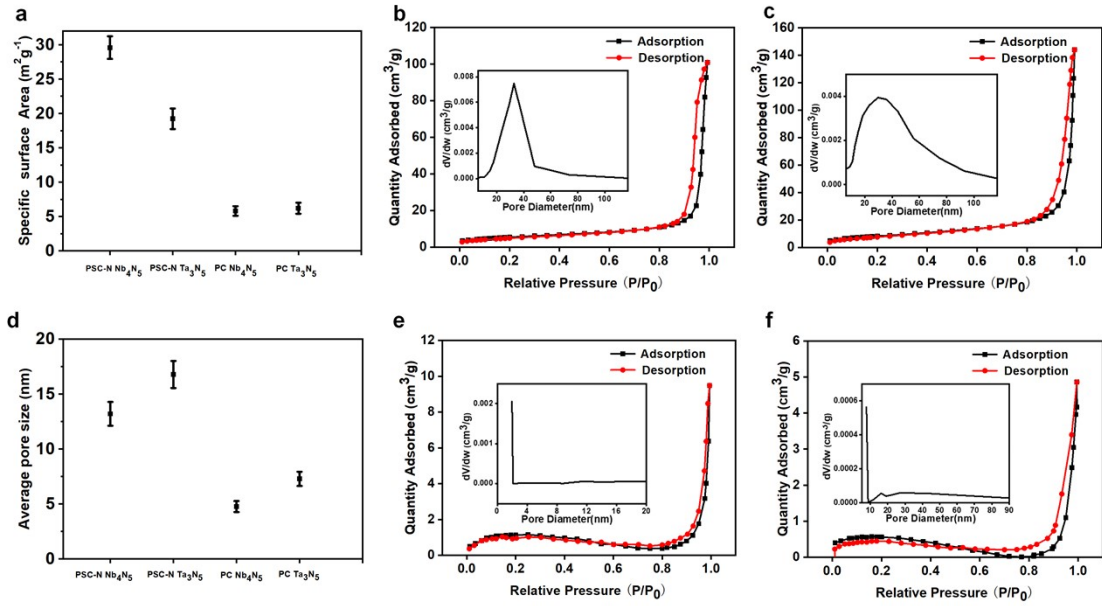

Fig. S3. (a, d) The Specific surface area and average pore size of PSC-N Nb<sub>4</sub>N<sub>5</sub>, Ta<sub>3</sub>N<sub>5</sub> and PC Nb<sub>4</sub>N<sub>5</sub>, Ta<sub>3</sub>N<sub>5</sub>. (b) Nitrogen adsorption-desorption isotherm of PSC-N Nb<sub>4</sub>N<sub>5</sub>. (c) Nitrogen adsorption-desorption isotherm of PSC-N Ta<sub>3</sub>N<sub>5</sub>. (e) Nitrogen adsorption-desorption isotherm of PC Nb<sub>4</sub>N<sub>5</sub>. (f) Nitrogen adsorption-desorption isotherm of PC Ta<sub>3</sub>N<sub>5</sub>.

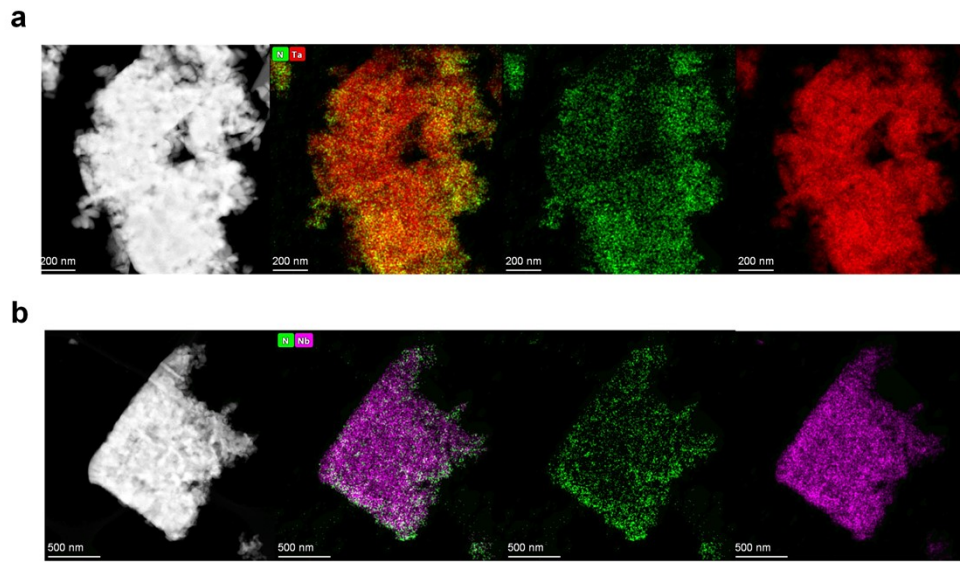

Fig. S4. TEM mapping images of Ta<sub>3</sub>N<sub>5</sub> and Nb<sub>4</sub>N<sub>5</sub>

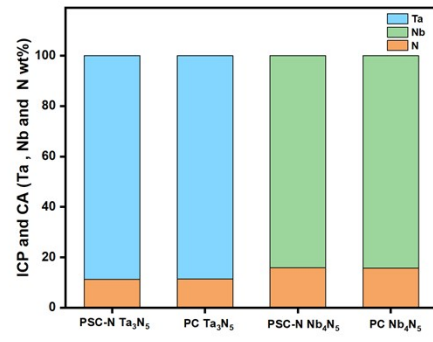

Fig. S5. The element analysis of Ta<sub>3</sub>N<sub>5</sub> and Nb<sub>4</sub>N<sub>5</sub>

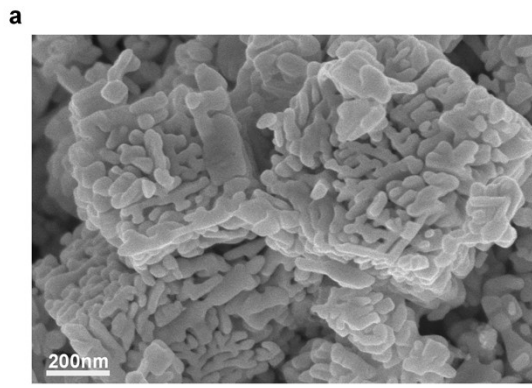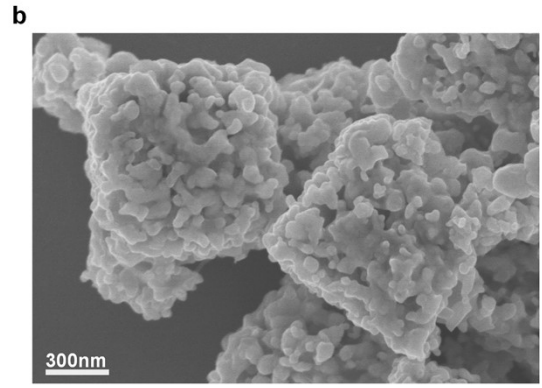

Fig. S6. (a) PSC-N  $Ta_3N_5$  (b) PSC-N  $Nb_4N_5$ .



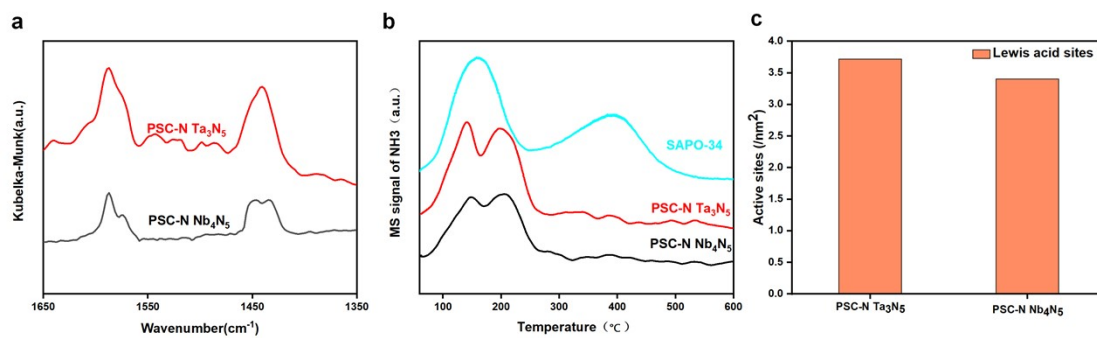

Figure.S7. (a) FTIR spectra of adsorbed pyridine (b) NH<sub>3</sub>-TPD profiles of PSC-N Ta<sub>3</sub>N<sub>5</sub>, PSC-N Nb<sub>4</sub>N<sub>5</sub> and molecular sieves sample (SAPO-34) (c) Density of Lewis acid sites of different catalysts

**Table S1.** Comparative performance of ethane dehydrogenation to ethylene for PSC-N Ta<sub>3</sub>N<sub>5</sub> and PSC-N Nb<sub>4</sub>N<sub>5</sub> with other catalysts

| Catalyst                             | Temperature         | Gas                                                     | C <sub>2</sub> H <sub>6</sub> conversion &    |       | Ref          |
|--------------------------------------|---------------------|---------------------------------------------------------|-----------------------------------------------|-------|--------------|
|                                      | (°C)                | composition                                             | C <sub>2</sub> H <sub>4</sub> selectivity (%) |       |              |
| PSC-N Ta <sub>3</sub> N <sub>5</sub> | 680                 | C <sub>2</sub> H <sub>6</sub> /He=1:9                   | 23.6%                                         | 92.4% | This work    |
| PSC-N Nb <sub>4</sub> N <sub>5</sub> | 680                 | C <sub>2</sub> H <sub>6</sub> /He=1:9                   | 21.4%                                         | 90%   | This work    |
| Pt@HZSM-5                            | 550                 | C <sub>2</sub> H <sub>6</sub> /N <sub>2</sub> =9:1      | 15.2%                                         | 88.4% | <sup>3</sup> |
| MoN                                  | 660                 | C <sub>2</sub> H <sub>6</sub> /He=1:9                   | 25%                                           | 99%   | <sup>4</sup> |
| 2.5 wt.% P+<br>Mo/ZSM5               | 600                 | C <sub>2</sub> H <sub>4</sub> /N <sub>2</sub> /He=1:1:8 | 17%                                           | 77%   | <sup>5</sup> |
| Pt/M-TS-1                            | 600                 | C <sub>2</sub> H <sub>6</sub> /Ar =3:1                  | 15.7%                                         | 99%   | <sup>6</sup> |
| CsRu/CeO <sub>2</sub>                | 700                 | C <sub>2</sub> H <sub>6</sub> /N <sub>2</sub> =1:1      | 41%                                           | 87%   | <sup>7</sup> |
| 0.8Cr/MFI                            | 650                 | C <sub>2</sub> H <sub>6</sub> /N <sub>2</sub> =2:8      | 17.2%                                         | 99%   | <sup>8</sup> |
| 0.125-Pd /TiO <sub>2</sub>           | Room<br>temperature | C <sub>2</sub> H <sub>6</sub> /Ar =1:1                  | 0.26%                                         | 94.2% | <sup>9</sup> |

## References

1. G. Lin, Y. Su, X. Duan and K. Xie, *Angew Chem Int Ed Engl*, 2021, **60**, 9311-9315.
2. X. Yu, F. Cheng, X. Duan and K. Xie, *Research (Wash D C)*, 2022, **2022**, 9861518.
3. B. Qiu, Y. Zhang, Y. Liu and Y. Zhang, *Applied Surface Science*, 2021, **554**.
4. G. Lin, H. Li and K. Xie, *Angew Chem Int Ed Engl*, 2020, **59**, 16440-16444.
5. Z. Ji, H. Lv, X. Pan and X. Bao, *Journal of Catalysis*, 2018, **361**, 94-104.
6. Y. Pan, A. Bhowmick, W. Wu, Y. Zhang, Y. Diao, A. Zheng, C. Zhang, R. Xie, Z. Liu, J. Meng and D. Liu, *ACS Catalysis*, 2021, **11**, 9970-9985.
7. X. Wang, Y. Wang, B. Robinson, Q. Wang and J. Hu, *Journal of Catalysis*, 2022, **413**, 138-149.
8. S. De, S. Ould-Chikh, A. Aguilar, J.-L. Hazemann, A. Zitolo, A. Ramirez, S. Telalovic and J. Gascon, *ACS Catalysis*, 2021, **11**, 3988-3995.
9. Q. Li, H. Yue, C. Liu, K. Ma, S. Zhong, B. Liang and S. Tang, *Chemical Engineering Journal*, 2020, **395**.
